# Supplementary material for: Stronger enhancer II/core promoter activities of hepatitis B virus isolates of B2 subgenotype than those of C2 subgenotype
Source: PubMed Central journal article supplement (PMC4961966; doi:10.1038/srep30374), 2016-07-27
Supplement: srep30374-s1.pdf [file srep30374-s1.pdf]

**Stronger enhancer II/core promoter activities of hepatitis B virus isolates of B2 subgenotype than those of C2 subgenotype**

Yanli Qin<sup>1</sup>, Xueshi Zhou<sup>3</sup>, Haodi Jia<sup>4</sup>, Chaoyang Chen<sup>4</sup>, Weifeng Zhao<sup>3</sup>, Jiming Zhang<sup>1#</sup> and Shuping Tong<sup>2, 4#</sup>

<sup>1</sup>Department of Infectious Diseases, Huashan Hospital, Fudan University, Shanghai, China; <sup>2</sup>The Liver Research Center, Rhode Island Hospital, Warren Alpert School of Medicine, Brown University, Providence, RI, USA; <sup>3</sup>Department of Infectious Diseases, the First Affiliated Hospital of Soochow University, Suzhou, Jiangsu Province, China; <sup>4</sup>Key Lab of Medical Molecular Virology, School of Basic Medical Sciences, Fudan University, Shanghai, China.

Running head: Core promoter activities of HBV B2 vs. C2 genotype

# Address correspondence to Jiming Zhang, M.D, Department of Infectious Diseases, Huashan Hospital, 12 Middle Wulumuqi Road, Shanghai 200040, China. Phone: +86 21 52888125. Fax: +86 21 62486140. Email: [jmzhang@fudan.edu.cn](mailto:jmzhang@fudan.edu.cn); Shuping Tong, M.D.; Ph.D. Liver Research Center, Rhode Island Hospital, 55 Claverick Street, Providence, RI 02903, USA. Phone: 01-401-444-7365. Fax: 01-401-444-2939. Email: [shuping\\_tong\\_md@brown.edu](mailto:shuping_tong_md@brown.edu).

Y.Q. and X.Z. contributed equally to this work.

**Supplementary Table. 1. Primers used to amplify HBV transcriptional regulatory elements and restriction sites used for cloning of PCR products.**

| <b>Regulatory elements</b> | <b>Primer</b> | <b>Sequence (5'-3')*</b>                              | <b>Position</b> | <b>Restriction site</b> |
|----------------------------|---------------|-------------------------------------------------------|-----------------|-------------------------|
| ENI+ENII                   | S1-a          | TCGATC <u>TCGAGCTTCATGGGATATGTAATTGGGGTTG</u>         | 876-898         | XhoI                    |
|                            | S1-b          | TCGATC <u>TCGAGCTTCATGGGATATGTAATTGGAAG</u>           | 876-898         |                         |
|                            | S1-c          | TCGATC <u>TCGAGCTTCATGGGATATGTAATTGGGAG</u>           | 876-898         |                         |
|                            | AS1           | <u>CACCCAAGGCACAGCTTGGG</u> <b>AGCT</b> CGAACAGT      | 1857-1886       | SacI                    |
| ENI+ENII+CP                | S2-a          | TCGAT <b>GAGCT</b> <u>CCTTCATGGGATATGTAATTGGGGTTG</u> | 873-899         | SacI                    |
|                            | S2-b          | TCGAT <b>GAGCT</b> <u>CCTTCATGGGATATGTAATTGGAAG</u>   | 873-896         |                         |
|                            | S2-c          | TCGAT <b>GAGCT</b> <u>CCTTCATGGGATATGTAATTGGGAG</u>   | 873-896         |                         |
|                            | AS2           | <u>CACCCAAGGCACAGCTTGGG</u> <b>AGCTT</b> GAACAGT      | 1871-1886       | HindIII                 |
| ENI                        | S3-a          | TCGATA <u>GATCTCTTCATGGGATATGTAATTGGGGTTG</u>         | 873-899         | BglII                   |
|                            | S3-b          | TCGATA <u>GATCTCTTCATGGGATATGTAATTGGAAG</u>           | 873-896         |                         |
|                            | S3-c          | TCGATA <u>GATCTCTTCATGGGATATGTAATTGGGAG</u>           | 873-896         |                         |
|                            | AS3           | <u>TATTGAGCT</u> <b>CGCAGTATGGATCGGCAGAGGAG</b>       | 1276-1253       | SacI                    |
| ENII                       | S4            | CACTC <u>TCGAGCCTCTGCACGTCGCATGGA</u>                 | 1584-1612       | XhoI                    |
|                            | AS4           | <u>GACCAATTTATGCCTGGTAC</u> <b>CTCC</b>               | 1798-1776       | KpnI                    |
| ENII+CP                    | S5            | <u>GAAACCACCGTGAGCT</u> <b>CCCACC</b>                 | 1611-1632       | SacI                    |
|                            | AS5           | CAAGGCACAGCTTGGG <b>AGCTT</b> GAAC                    | 1886-1862       | HindIII                 |

\*underlined sequences are HBV specific. Restriction sites are in bold.
